1     **Thrombin cleaves and activates the protease-activated receptor 2**  
2     **dependent on thrombomodulin co-receptor availability**  
3

4     Dorothea M. Heuberger,\*\* Alessandro G. Franchini,\* Jerzy Madon,\* Reto A. Schuepbach\*

5

6     \*Institute of Intensive Care Medicine, University Hospital Zurich, University of Zurich, Zurich,  
7     Switzerland

8     \*Surgical Research Division, University Hospital Zurich, University of Zurich, Zurich, Switzerland

9

10

11    Corresponding author:

12    Reto A. Schuepbach, MD, MSc

13    University Hospital Zurich, University of Zurich

14    Institute of Intensive Care Medicine

15    OPS B 17/Lab E 26

16    Raemistrasse 100

17    CH-8091 Zurich

18    Tel.: +41 44 255 1092

19    Email: reto.schuepbach@usz.ch

20

21    Short title: TM-bound thrombin cleaves PAR2

22

23 **Abstract**

24 *Introduction*

25 Protease-activated receptors (PARs) evolved to react to extracellular proteolytic  
26 activity. In mammals, three of the four PARs (PAR1, PAR3, and PAR4) that are  
27 expressed respond to the prototypical procoagulant enzyme thrombin, whereas  
28 PAR2 was assumed to resist activation by thrombin. To date, involvement of cell  
29 surface thrombin-recruiting co-receptors such as thrombomodulin (TM), which  
30 potentially facilitates PAR2 cleavage, has not been addressed. Thus, we examined  
31 whether TM-bound thrombin cleaved PAR2 and tested biological responses such as  
32 nuclear factor kappa B (NF- $\kappa$ B) DNA binding activity and cytokine release.

33

34 *Materials and Methods*

35 We examined 293T cells overexpressing PAR2 and TM for thrombin recruitment by  
36 TM promoting PAR2 cleavage. To test for the TM–thrombin interactions required for  
37 PAR2 cleavage and to map cleavage sites on PAR2, mutant constructs of TM or  
38 PAR2 were engineered. Biological effects because of PAR2 activation were  
39 investigated using an NF- $\kappa$ B reporter system and cytokine release.

40

41 *Results and Conclusions*

42 We identified that, at low to moderate concentrations, thrombin cleaved PAR2 in a  
43 TM co-receptor-dependent manner with cleavage efficiency comparable to that of  
44 trypsin. In TM's presence, thrombin efficiently cleaved both, PAR1 and PAR2, albeit  
45 kinetics differed. Whereas the majority of surface expressed PAR1 was immediately  
46 cleaved off, prolonged exposure to thrombin resulted in few additional cleavage. In  
47 contrast, PAR2 cleavage was sustained upon prolonged exposure to thrombin.  
48 However, TM EGF-like domain 5 was required and TM chondroitin sulfate (CS)  
49 proteoglycan sites serine 490 and serine 492 assisted in PAR2 cleavage, while  
50 thrombin preferentially cleaved at arginine 36 on PAR2's N-terminus. Note that  
51 thrombin-induced activation of NF- $\kappa$ B via PAR2 resulted in release of interleukin-8.  
52 Thus, we provide a novel concept of how thrombin efficiently cleaves PAR2 in a TM-  
53 dependent manner, resulting in pro-inflammatory interleukin-8 release. This  
54 unexpected pro-inflammatory role of TM, promoting cleavage and activation of PAR2

55 by thrombin, may lead to novel therapeutic options for treating inflammatory and  
56 malignant diseases.

57

58 Keywords: Receptor; PAR 2; thrombin; thrombomodulin; trypsin; NF- $\kappa$ B, IL-8

59

## 60 **Abbreviations**

61 PAR: protease-activated receptor

62 TM: thrombomodulin

63 CS: chondroitin sulfate

64 EGF-like domain: epidermal growth factor-like domain

65

## 66 **Introduction**

67 Clotting proteases elicit multiple physiological and pathophysiological responses  
68 beyond clot formation. The family of PARs has evolved to allow cells to react to  
69 presence of clotting (serine) proteases [1]. PARs belong to the seven-  
70 transmembrane G-protein-coupled receptor family. In mammals, the family of PARs  
71 consists of four highly related serine protease receptors, i.e., PAR1–4 [2-7].

72 Previously, PAR2 has been linked to inflammation-driven diseases of the brain,  
73 cardiovascular system, lungs, joints, and gastrointestinal tract [8-16], as well as  
74 cancer growth [17, 18], migration, and metastasis [9, 19]. Despite its importance in  
75 pathophysiological processes, no treatments based on interference with PAR2 have  
76 been established [20]. There are potential obstacles for defining therapeutic targets  
77 because of the existence of multiple activation mechanisms and a large variety of  
78 causal activating proteases [21-23], as well as the complex nature of PAR2  
79 compartmentalization and co-localization [19]. Recent studies that emphasize the  
80 importance of PAR hetero-dimerization [24], requirement of PAR2 co-localized co-  
81 receptors [22], and introduction of the concept of biased PAR agonists [25] further  
82 demonstrate the complexity of PAR2-related functions under physiological or  
83 pathophysiological conditions.

84 To date, PAR2 has been assumed to resist activation by the prototypical  
85 procoagulant protease thrombin, as it has not been observed to activate  
86 overexpressed PAR2 in the absence of co-receptors [1, 5, 26]. Moreover, only

87 extremely high, potentially supra-physiological concentrations of thrombin (up to  
88 500 nM) cleave peptides that are homologous to PAR2's N-terminus and activate  
89 PAR2 [27].

90 Unlike previous observations of PAR2 resisting thrombin activation, *in vitro* and *in*  
91 *vivo* models have demonstrated multiple effects involving both, PAR2 and thrombin,  
92 such as cancer cell invasion [18], signal transduction [28, 29], and late sepsis. To  
93 explain these observations, PAR1 and PAR2 transactivation is the leading model;  
94 the thrombin-generated N-terminus of PAR1 signaling via a PAR2 hetero-dimer  
95 partner [24, 30].

96 To date, the activation of PAR2 by cofactor (or co-receptor)-bound thrombin has  
97 not been systematically evaluated, although co-receptor-dependent mechanisms,  
98 such as tissue factor-bound clotting factor VIIa activating PAR2 [22], endothelial  
99 protein C receptor-bound activated protein C (aPC) cleaving PAR1 and PAR3 [31],  
100 endothelial protein C receptor-bound clotting factor Xa cleaving PAR1 [32], and  
101 activating PAR1 or PAR3 [33-35], are well known. Moreover, in mice, PAR3 recruits  
102 thrombin which facilitates cleavage of PAR4 [36].

103 For thrombin-mediated activation of protein C, the cell surface glycoprotein TM  
104 (also known as fetomodulin or CD141) serves as a cofactor [37,38]. TM is primarily  
105 expressed on all vascular endothelial cells [39], keratinocytes [40], astrocytes [41],  
106 monocytes and macrophages [42], and lung alveolar epithelial cells [43].

107 Because TM serves as the key re-director of procoagulant thrombin [44], which  
108 limits clot formation and injury to the vascular bed [45], TM might play a role in re-  
109 directing PAR activation by thrombin in situations of ongoing thrombin generation  
110 such as chronic inflammation. Note that TM-bound thrombin changes substrate  
111 specificity of thrombin to anticoagulant and anti-inflammatory signaling via protein C  
112 activation. TM expression is linked to regulation of homeostatic and inflammatory  
113 responses during injuries [46]. For acute injuries of the endothelium, TM  
114 downregulation or shedding occurs; accordingly, soluble TM (sTM) serves as a  
115 marker for acute inflammation [47]. Furthermore, compared with the endothelium,  
116 less is known about the TM co-receptor's function in other tissues.

117

118 Therefore, we tested whether TM serves as a co-receptor for the thrombin-  
119 dependent cleavage of PAR2. Moreover, we verified whether TM-bound thrombin  
120 activation of PAR2 resulted in pro- or anti-inflammatory effects.

121

## 122 **Materials and Methods**

### 123 **Reagents**

124 Thrombin [EC 3.4.21.5] was purchased from Haematologic Technologies (Essex  
125 Junction, VT, USA) and trypsin [EC 3.4.21.4] from Gibco (Thermo Fisher Scientific,  
126 Reinach, Switzerland). Recombinant aPC (Xigris) was purchased from Eli Lilly and  
127 Company (Indianapolis, IN, USA). Peptides corresponding to the N-terminus of R41-  
128 cleaved PAR1 (TFLLRNPNDK), R36-cleaved PAR2 (SLIGRL), and PAR4 (AYPGKF)  
129 were custom-made (Synpeptide Co., Ltd., Shanghai, China; and ProteoGenix,  
130 Schiltigheim, France).

131 Recombinant sTM (SRP3172), Nordihydroguaiaretic acid (NDGA), TNF $\alpha$  and  
132 PI3K inhibitor LY294002 were purchased from Sigma (Buchs SG, Switzerland). We  
133 used lepirudin (Refludan; Schering, Berlin, Germany) to block thrombin. In fact, when  
134 added without thrombin, lepirudin had no effect in any of the reported assays and  
135 readouts. Heparin was purchased from Bichsel (Interlaken, Switzerland). Thrombin  
136 exosite I blocking aptamer (5'-GGTTGGTGTGGTTGG-3' [48]) and exosite II blocking  
137 aptamer (5'-AGTCCGTGGTAGGGCAGGTTGGGGTGACTION-3' [49]) were custom-  
138 made (Microsynth, Balgach, Switzerland). Monoclonal anti-PAR1 ATAP2 was used  
139 as described previously [32, 50] and anti-PAR2 (SAM11; Thermo Fisher Scientific),  
140 anti-PAR2\_#344222 (MAB3949; R&D Systems, Inc., MN, USA), anti-TM\_#1009  
141 [141C01(1009), Thermo Fisher Scientific], anti-TM\_#2375 (American Diagnostics,  
142 Pfungstadt, Germany), anti-TM\_#501733 (MAB3947; R&D Systems), anti-  
143 His\_#AD1.1.10 (MAB050; R&D Systems), and goat anti-mouse IgG Alexa-594  
144 (R37121; Thermo Fisher Scientific) were all used according to manufacturer's  
145 instructions unless stated otherwise. All oligonucleotides were purchased from  
146 Microsynth. For quantifying luciferase activity, the Bright-Glo™ Luciferase Assay  
147 System (Promega, Dübendorf, Switzerland) was used, in accordance to the  
148 manufacturer's instructions.

149

### 150 **Peptide cleavage**

151 A high-binding microplate (#9018; Corning, Tewksbury, MA, USA) was coated (o/n)  
152 with anti-His#AD1.1.10 (2  $\mu$ g/ml) and anti-TM\_#501733 (1  $\mu$ g/ml). Then, the plate  
153 was washed and incubated with buffer or recombinant sTM (60 nM) to bind to anti-

154 TM for 30 minutes. Synthetic PAR2 peptide (10 µg/ml) was bound to the plate by the  
155 N-terminal His-tag (1 h). We added pre-warmed thrombin (30 nM) to the washed  
156 plate and incubated the plate for 1 h at 37°C. The uncleaved (full length) PAR2  
157 peptide was detected via the C-terminal biotin-tag using streptavidin-HRP and  
158 quantified by a peroxidase-based enzyme immunoassay.

159

### 160 **Cell culture, plasmid transfection, and gene silencing**

161 Epithelial A549 cells and human embryonic kidney cell-derived 293T cells (ATCC;  
162 LGC Standards GmbH, Wesel, Germany) were cultivated and propagated as  
163 described previously [32, 50]. In brief, cells were propagated in DMEM (Gibco)  
164 containing 10% fetal calf serum (GE Healthcare, Glattbrugg, Switzerland), detached  
165 using dissociation buffer (Gibco), transfected, seeded, and grown to confluence in  
166 multi-well dishes. Two days later, experiments were performed using washed cells  
167 and serum-free conditioning medium (DMEM) containing 0.04% BSA (Sigma).

168 Tagged and untagged PAR1, PAR2, TM constructs, and pGL4.32[*Luc2P*/NF-κB-  
169 RE/Hygro] (Promega) were transiently expressed in 293T cells by transfection with  
170 Lipofectamine2000 (Thermo Fisher Scientific), as described previously [34]. Cells  
171 used for cleavage assays were transfected with 1.6 µg/ml plasmid DNA; however, for  
172 NF-κB luciferase and IL-8 enzyme-linked immunosorbent assay (ELISA) assays,  
173 1.0 µg/ml plasmid DNA was used for transfection of the 293T cells. To reach  
174 comparable amounts of PAR2 expression, in those cells that overexpressed several  
175 proteins (such as with and without TM), the empty pcDNA3.1/Zeo(+) plasmid  
176 (Thermo Fisher Scientific) was used as a mock plasmid. We performed gene  
177 silencing using Lipofectamine RNAiMAX (Thermo Fisher Scientific) as described  
178 previously [32], using 20 nM silencing RNA (siRNA). GGAACCAAUAGAUCUCUAtt  
179 (si PAR2) to silence PAR2 and AGGUAGUGUAAUCGCCUUGtt was used as a  
180 control silencing RNA (si control). Furthermore, all oligonucleotides were synthesized  
181 by Microsynth.

182

### 183 **Overexpression constructs**

184 The overexpression constructs were embedded within the pcDNA3.1/Zeo(+) (Thermo Fisher Scientific) expression plasmid, as described previously [34]. TM was  
185 cloned from cDNA (obtained from RNA isolated from EA.hy926 endothelial cells)  
186 using primers containing restriction sites (*italics*) HindIII and XhoI (forward: 5'-  
187

188 GCTAAAGCTTGACAGGAGAGGCTGTGCGCCATC-3' and reverse: 5'-  
189 GCTACTCGAGGGGAATAAGTGGGGCTTGCT-3'). The HindIII/XhoI-digested PCR  
190 product was directly introduced into the HindIII/XhoI-cut pcDNA3.1/Zeo(+) backbone.  
191 For removal of N-terminal domains in TM, two unique BamHI restriction sites were  
192 introduced by mutagenesis (NEB's plasmid mutation kit; Ipswich, MA, USA): the first  
193 3' from the signal sequence and the second 3' from the sequence that encoded the  
194 domain to be removed. Digestion of the mutated TM expression vector with BamHI  
195 followed by plasmid re-ligation allowed dropping domains while maintaining the TM  
196 native signal sequence (details are provided in Supplementary Table S1). Note that  
197 TM chondroitin sulfate (CS) sites serine 490 and 492 were mutated to alanine with  
198 the primer set (forward: 5'-CACGGCTCGACCTCAATG-3', reverse: 5'-  
199 GGGGCTCGCCAGCGCCGGCGTTCGCCACCGTCC-3').

200 PAR1 and PAR2 alkaline phosphatase-tagged reporter ("AP-PAR1 and AP-  
201 PAR2") was as described elsewhere [34]. Sequence of the PAR4 alkaline  
202 phosphatase-tagged reporter ("AP-PAR4") is described in Supplementary Table S4.  
203 In brief, an alkaline phosphatase (AP) tag (pSEAP; Clontech, CA, USA) was linked  
204 to the N-terminus of PAR1 cDNA (F2R, NM\_001992.4), PAR2 cDNA (F2RL1,  
205 NM\_005242.5), and PAR4 cDNA (F2RL3, NM\_003950.3). Unlike the PAR2  
206 construct mentioned elsewhere [34], an arginine (*italics*) at the C-terminal end of AP  
207 (potential thrombin cleavage site) was removed using phosphorylated mutagenic  
208 primers (forward: 5'-CCCGGGTTACTCTGCGGCCCAAGGAACCAATAG-3'; reverse:  
209 5'-CTATTGGTTCCTTGGGCCGAGAGTAACCCGGG-3'; Supplementary Table S2).  
210 We inserted a green fluorescent C-terminal tag (EGFP; Clontech) analogous to a  
211 procedure used in a previous study [34] (for details, see Supplementary Table S2  
212 and Supplementary Scheme S1). To test for preferred cleavage sites on PAR2's N-  
213 terminal, arginine 36 was replaced by alanine ("PAR2 R36A;" protein sequence in  
214 Supplementary Table S3) using mutagenic primers (forward:  
215 5'-CCAATAGATCCTCTAAAGGAGCAAGCCTTATTGGTAAGG-3'; reverse:  
216 5'-TTCCTTGGGCCGAGAGTAACCCGGG-3'). Next, all potential thrombin  
217 cleavage sites (arginine and lysine) were replaced by alanine ("PAR2 all-to-A"  
218 mutant; protein sequence provided in Supplementary Table S3). Note that all  
219 constructs that were used were verified by sequencing.

220

221 **PAR cleavage reporter assay**

222 The cleavage reporter assay was performed on 293T cells that transiently  
223 expressing AP-PAR constructs (Supplementary Table S2), as described elsewhere  
224 [32]. In brief, washed cells were incubated with an agonist (for 20 minutes, or if  
225 indicated, for repeated periods of 20 minutes), supernatants were removed and  
226 filtered (cellulose ester filter; pore size, 0.45  $\mu\text{m}$ ), and AP activity was quantified (1-  
227 Step PNPP; Thermo Fisher Scientific) by spectrophotometry (Labsystems Multiskan  
228 MCC/340; Fisher Scientific). For all experiments, AP-PAR expression levels were  
229 confirmed to be comparable among constructs by quantifying AP activity of cell  
230 surface. Data are presented in optical density (OD) after subtraction of signals  
231 obtained from cells not incubated with the agonist.

232

### 233 **Immunoassays**

234 IL-8 was quantified by a commercial (R&D Systems) sandwich ELISA, according to  
235 the manufacturer's instructions. In brief, 293T cells were transfected with plasmid  
236 DNA and A549 cells that were silenced with siRNA 48 h prior to incubation with  
237 agonists for 24 and 6 h, respectively. Then, IL-8 release was measured in  
238 supernatants. As described previously, cell surface PAR2 and TM were quantified by  
239 cell surface ELISA [50].

240

### 241 **Immunofluorescence microscopy**

242 EGFP-tagged protein (Supplementary Scheme S1) was overexpressed using the  
243 same protocols as that described for PAR cleavage reporter constructs and  
244 visualized using appropriate filter sets of an Axiovert-10 fluorescent microscope (Carl  
245 Zeiss AG, Feldbach, Switzerland). As described for the cell surface ELISA, untagged  
246 proteins were incubated with antibodies; however, the secondary antibody carried an  
247 Alexa-594 fluorescent tag (Thermo Fisher Scientific) rather than HRP.

248

### 249 **NF- $\kappa$ B luciferase assay**

250 293T cells were transfected with the NF- $\kappa$ B firefly luciferase construct  
251 pGL4.32[*luc2P*/NF- $\kappa$ B-RE/Hygro] (Promega) along with AP-PAR constructs and  
252 seeded into black, clear-bottomed 96-well plates (Greiner Bio-One, Kremsmünster,  
253 Austria). After transfection for 48 h, cells were washed and incubated with an agonist  
254 (for 6 h) at 37°C. Bright-Glo™ Luciferase Assay System reagent was added to cells



255 and luciferase activity was detected via luminescence (SpectraMax i3; Molecular  
256 Devices, San Jose, CA, USA), according to the manufacturer's instructions.  
257 Furthermore luciferase activity was normalized to the buffer-induced relative light  
258 units (RLUs).

259

## 260 **Statistics**

261 We analyzed and presented the data using GraphPad Prism5 (GraphPad Software,  
262 La Jolla, CA, USA). To calculate the indicated P-values, a two-sample, two-tailed  
263 homoscedastic t-test and one-way or two-way ANOVA with Bonferroni correction  
264 were used.

265

266

## 267 **Results**

### 268 **Effect of PAR2 activation by thrombin on IL-8 release in native A549 cells**

269 Various studies showed expression of all PARs in lung epithelial cells promoting IL-8  
270 release upon PAR agonist peptide stimulation due to PAR cis- or trans-activation  
271 [51] [52]. In this study, we first tested the concentrations of PAR agonist peptides  
272 required to induce IL-8 secretion in A549 cells. Similar to a previous study [53], we  
273 found that A549 cells were induced to release IL-8 on incubation with the PAR2  
274 agonist peptide SLIGRL, whereas the PAR1 agonist peptide TFLLRNPNDK and the  
275 specific PAR4 agonist peptide AYPGKF demonstrated no such effect, even at high  
276 concentrations. Unlike the PAR1-specific peptide, thrombin significantly induced IL-8  
277 release from 30 to 100 nM (Figure 1A). To test whether thrombin induced IL-8  
278 release could be linked to PAR2 activation, we relied on the PAR2-specific inhibitor  
279 NDGA. NDGA did neither affect IL-8 release at baseline (buffer control) nor in highly  
280 TNF $\alpha$ -induced A549 cells (not shown). However, NDGA significantly reduced IL-8  
281 release by thrombin as well as by the PAR2-specific agonist SLIGRL (Figure 1B).  
282 Consistently, silencing of PAR2 by siRNA abolished responses of A549 cells to  
283 thrombin or SLIGRL induction (Figure 1C). In summary, IL-8 release by thrombin  
284 stimulation was significantly reduced in PAR2-silenced or inhibited lung epithelial  
285 cells, suggesting that thrombin plays a role in PAR2 signaling.

286

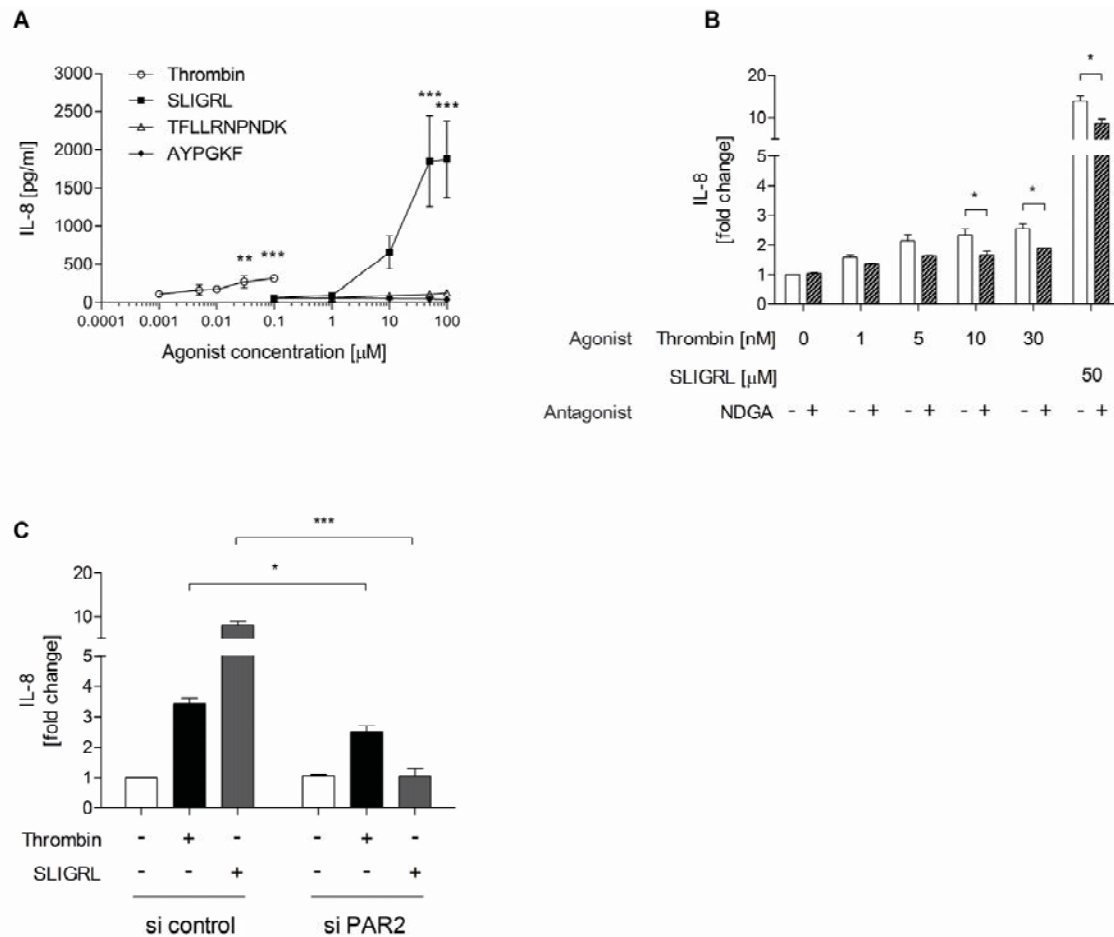

287

288 **Figure 1: Increased IL-8 release upon thrombin and SLIGRL stimulation in a**  
 289 **PAR2-dependent manner.** (A) A549 cells were stimulated with thrombin, PAR2  
 290 agonist peptide SLIGRL, PAR1 agonist peptide TFLLRNPNDK, and PAR4 agonist  
 291 peptide AYPGKF for 6 h. Then, IL-8 release was quantified by a peroxidase-based  
 292 enzyme immunoassay. (B) A549 were pretreated with DMSO or NDGA (20 μM) for  
 293 30 min before stimulation with buffer, thrombin or SLIGRL (concentrations indicated  
 294 in the graph). IL-8 release in the supernatant was quantified by ELISA after 6 h of  
 295 agonist incubation. (C) A549 cells were transfected with siRNA targeting no specific  
 296 mRNA (si control) or siRNA targeting PAR2 (si PAR2). Then, cells were stimulated  
 297 with buffer, thrombin (30 nM), or SLIGRL (50 μM) for 6 h before IL-8 release was  
 298 measured in cell supernatants. Data was presented as mean ± SEM; three  
 299 independent experiments were each performed in triplicate; ns  $p > 0.05$ , \*  $p < 0.05$ ,  
 300 \*\*  $p < 0.01$ , \*\*\*  $p < 0.001$ , \*\*\*\*  $p < 0.0001$  using one-way ANOVA (A) and student's  $t$   
 301 test (B,C).

302

### 303 Role of TM on PAR2 cleavage by thrombin

304 To test whether IL-8 induction by thrombin in epithelial cells of the lung could be  
 305 caused by direct cleavage of PAR2 using a co-receptor, we established a purified

306 system comprising immobilized PAR2 peptide with immobilized sTM and thrombin.  
307 In this purified system, thrombin efficiently cleaved the PAR2 peptide in immobilized  
308 sTM's presence; however, consistent with the established conclusion, thrombin  
309 failed to directly cleave PAR2 in the co-receptor's absence (Figure 2A). To test on  
310 human cells whether physiologically achievable concentrations of thrombin cleaved  
311 PAR2 and whether co-receptor(s) could be involved, we relied on the previously  
312 established PAR cleavage reporter system [32, 34, 54]. To allow verification of  
313 construct expression by assessing the tag's cell surface AP activity and monitor  
314 cleavage by quantifying the activity of AP released into the supernatant, we  
315 overexpressed PAR2 containing an AP enzyme domain at the N-terminus  
316 (Supplementary Table S2; Supplementary Scheme S1, [34]). PAR2 reporter and TM  
317 constructs were expressed at the cell surface, which was further assessed by  
318 fluorescence microscopy and cell surface ELISA. Co-expression of PAR2 and TM  
319 did not affect expression of both constructs (Supplementary Fig. S1a and S1b). In  
320 such an overexpression system, free thrombin at concentrations up to 30 nM failed  
321 to cleave PAR2 (Figure 2B), unlike the results of a recent study [27]. However, in  
322 TM's presence, cleavage efficiency was significantly enhanced and, at low  
323 nanomolar concentrations of proteases, thrombin and trypsin showed comparable  
324 cleavage efficiency (Figure 2C). To test whether thrombin/TM could mediate release  
325 or activation of another protease, which ultimately cleaved PAR2, we added  
326 thrombin-induced supernatant from TM-expressing cells to 1) PAR2- and 2) PAR2-  
327 and TM-expressing cells, for assessing PAR2 cleavage. We identified that, in the  
328 absence of TM, PAR2 was not cleaved and, wherever thrombin in supernatant was  
329 blocked by the specific inhibitor lepirudin, cleavage was blunted (Figure 2D). Addition  
330 of activated protein C or inhibition of metalloproteases did not affect PAR2 cleavage  
331 by thrombin (Supplementary Fig. S3a and S3b). Therefore, overall, these results  
332 cannot support a model whereby thrombin induces a PAR2-cleaving protease. To  
333 simulate more physiological conditions where PAR1, PAR2 and TM are co-  
334 expressed, and to test whether the co-expression impacts cleavage, we  
335 overexpressed 1) PAR1 containing an N-terminal AP enzyme tag together with  
336 untagged-PAR2 or 2) PAR2 containing an N-terminal AP enzyme tag together with  
337 an untagged-PAR1 (Supplementary Table S2; Supplementary Scheme S1, [34]) in  
338 presence or absence of TM. As expected, PAR1 was rapidly cleaved by thrombin (5  
339 and 30 nM) while PAR2 - in TM's presence - was more efficiently cleaved upon

340 prolonged thrombin exposure (5 and 30 nM) (Figure 2E and 2F). The cleavage of  
341 PAR2 at 60 minutes of exposure to thrombin (30 nM) was comparably efficient to the  
342 PAR1 cleavage at 20 minutes (Figure 2F). Cleavage of PAR2 was sustained upon  
343 prolonged exposure to thrombin for up to 25 hours (Supplementary Fig. S4a-c). Note  
344 that, upon a exposure to thrombin for 3 hours, a broad range of thrombin  
345 concentrations from 1 to 30 nM resulted in significant cleavage of PAR2  
346 (Supplementary Fig. S4a-c). Our observations suggest that TM-bound thrombin  
347 directly cleaves PAR2 in our overexpression system and that TM dependent  
348 cleavage of PAR2 by thrombin is enhanced over time. Thus, in summary, our data  
349 suggest that thrombin at moderate concentrations (5 and 30 nM) efficiently cleaves  
350 overexpressed PAR2 reporter construct in TM's presence.

351

352

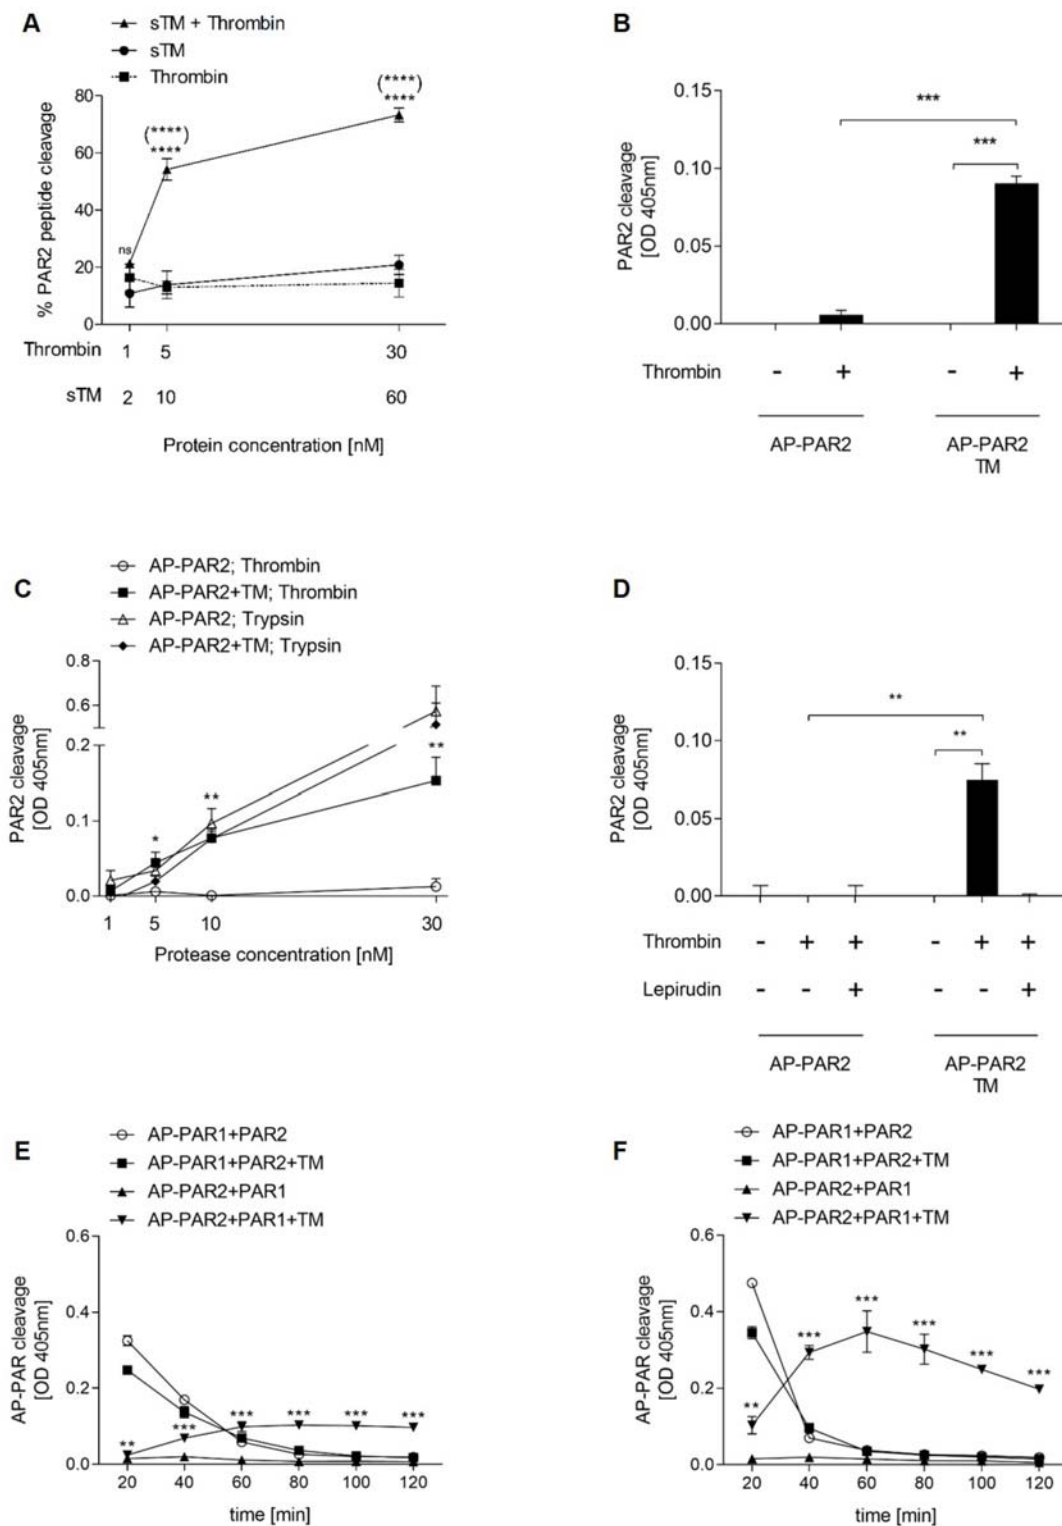

353

354

355

356

357

358

**Figure 2: Thrombin efficiently cleaves overexpressed PAR2 in the presence of TM.** (A) A PAR2-derived synthetic peptide mimicking the entire extracellular N-terminal domain of PAR2 was bound to the plate via a C-terminal 6xHis-tag and incubated with thrombin in the presence or absence of immobilized sTM. Uncleaved PAR2 was detected via ELISA peroxidase-based quantification of unremoved N-

359 terminal biotin tags. Stars indicate comparisons of \* PAR2 peptide cleavage of  
360 sTM+thrombin vs. thrombin without sTM or (\*) sTM+thrombin vs. sTM without  
361 thrombin. **(B)** 293T cells transiently overexpressing AP-PAR2 reporter construct  
362 either alone or with TM. Where indicated, cells were incubated with thrombin (30 nM)  
363 for 20 minutes before the released AP's activity was measured in the cells'  
364 supernatants, serving as a surrogate for PAR2 cleavage. **(C)** Cells expressing TM  
365 and AP-PAR2 reporter construct were incubated with agonists as indicated and  
366 assayed as described in (B). Stars indicate the comparison of thrombin to buffer in  
367 cells overexpressing AP-PAR2+TM. **(D)** 293T cells expressing only TM were  
368 incubated with thrombin (20 min, 30 nM). Thereafter, the supernatant was swapped  
369 to AP-PAR2- or AP-PAR2 and TM-expressing cells and the cells were incubated for  
370 another 20 minutes. Where indicated, the supernatant was pre-incubated with the  
371 thrombin inhibitor lepirudin (30 nM) before it was added to the cells expressing AP-  
372 PAR2 or AP-PAR2 and TM. **(E)** and **(F)** 293T cells expressing AP-PAR1 together with  
373 non-tagged PAR2 or AP-PAR2 together with non-tagged PAR1 with or without TM  
374 were incubated with **(E)** thrombin (5 nM) or **(F)** thrombin (30 nM) for 20 minutes. AP  
375 activity was measured in the supernatant and the cells were agonist-incubated for  
376 repeated periods of 20 minutes. Stars indicate the comparison of thrombin to buffer  
377 in cells overexpressing AP-PAR2+PAR1+TM. Data are presented as mean  $\pm$  SEM;  
378 (A-D) three or (E,F) four independent experiments, each performed in triplicate; ns  $p$   
379  $> 0.05$ , \*  $p < 0.05$ , \*\*  $p < 0.01$ , \*\*\*  $p < 0.001$ , using student's  $t$  test.

380

381

### 382 **Importance of interactions between TM EGF-like domains and CS with** 383 **thrombin exosite I and exosite II on PAR2 cleavage**

384 Next, we addressed domains of TM required for increasing PAR2 cleavage by  
385 thrombin. TM contains six epidermal growth factor (EGF)-like domains, from which  
386 EGF-like domain 4 was linked to protein C substrate acceptance, whereas EGF-like  
387 domains 5 and 6 were linked to thrombin recruitment [55] to the cell surface. To test  
388 whether these EGF-like domains were involved in promoting PAR2 cleavage, we  
389 produced N-terminally truncated mutants of TM (Supplementary Table S1). The  
390 mutants were expressed and recognized as expected by cell surface ELISA using  
391 anti-TM targeting EGF-like domains 5 and 6 (Supplementary Fig. S5). Note that  
392 PAR2 was efficiently cleaved when wild-type TM or mutants containing EGF-like  
393 domains 5 and 6 were present. The TM mutant composed of only EGF-like domain 6  
394 failed to promote the cleavage of PAR2 by thrombin (Figure 3A).

395 Moreover, interactions between thrombin exosite II and CS on TM were involved  
396 for thrombin recruitment [56] and to enhance the endothelial protein C pathway. To  
397 test whether such interactions between exosite II and CS facilitated PAR2 cleavage  
398 by thrombin, we synthesized a TM mutant that lacked the serine 490 and 492

399 glycosylation sites. Similar to the conclusions from the protein C pathway that  
400 interactions between exosite II and CS assist with thrombin recruitment toward TM,  
401 CS-deficient mutant of TM was less efficient for supporting the cleavage of PAR2 by  
402 thrombin (Figure 3B). Similarly, blocking the interactions of exosite II with CS with an  
403 aptamer, a short single-stranded DNA specifically blocking exosite II [49], interfered  
404 with PAR2 cleavage (Figure 3C). Supporting this observation, PAR2 cleavage was  
405 reduced by exosite II binding agent heparin (Supplementary Fig. S2). Unlike exosite  
406 II and TM interaction, the interaction of exosite I with EGF-like domain 5 and 6 of TM  
407 is considered essential for thrombin recruitment [57]. Moreover, blocking exosite I by  
408 an aptamer [48] blunted PAR2 cleavage by thrombin (Figure 3C).

409 To test whether sTM supports PAR2 cleavage by thrombin, thrombin was pre-  
410 incubated with recombinant sTM that lacks the membrane anchor. The mixture was  
411 then tested for PAR2 cleavage. In the absence of cell surface-expressed TM, sTM-  
412 thrombin mixture failed to significantly cleave PAR2 (Figure 3D). This observation  
413 supports either the lack of sTM's role in assisting PAR2 cleavage by thrombin or the  
414 failure of our cells to recruit sTM-thrombin complexes onto the cell surface.

415 Thus, similar to our observations of the protein C pathway, our data suggest that,  
416 for efficient PAR2 cleavage by thrombin, interactions between TM's EGF-like domain  
417 5 and the thrombin exosite I is particularly important, in addition to the efficiency-  
418 boosting effect of the interaction between CS and thrombin exosite II, as well as the  
419 essential role played by cell surface-anchored TM.

420

421

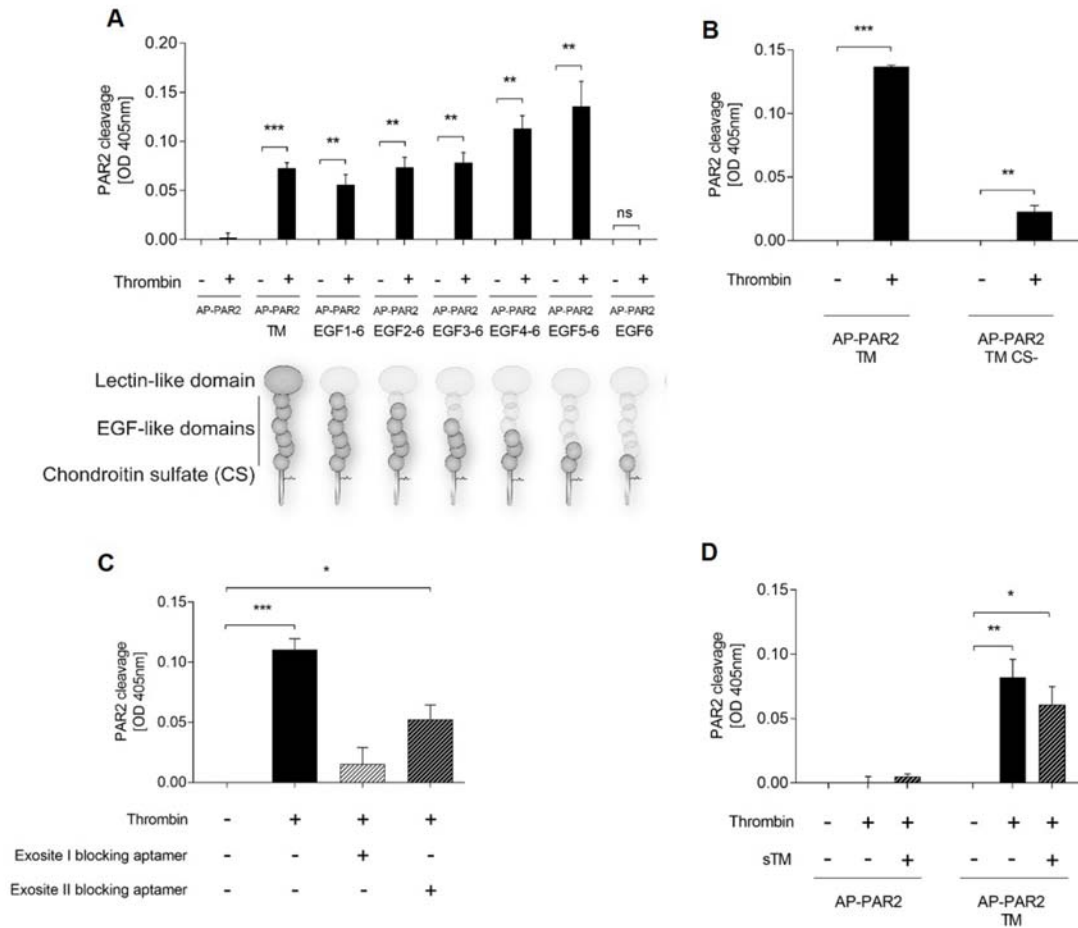

422

423 **Figure 3: For PAR2 cleavage by thrombin, interaction between thrombin**  
 424 **exosite I and TM's EGF-like domain 5 is necessary, along with interaction**  
 425 **between exosite II and TM's CS motif. (A)** 293T cells overexpressing AP-PAR2  
 426 reporter construct alone or together with either wild-type TM (TM) or mutants of TM  
 427 lacking N-terminal domain(s). Scheme of the expressed TM domains is provided  
 428 (bottom of A) and the details are explained in Supplementary Table S1. After  
 429 20 minutes of incubation with thrombin (30 nM), PAR2 cleavage was measured. **(B)**  
 430 AP-PAR2 reporter construct was co-expressed in 293T cells with wild-type TM or a  
 431 TM mutant lacking the CS sites serine 490 and 492 (TM CS-). Moreover, PAR2  
 432 cleavage by thrombin (30 nM) was measured as in (A). **(C)** 293T cells  
 433 overexpressing AP-PAR2 and TM were incubated (for 20 minutes) with buffer,  
 434 thrombin (30 nM), or a mixture of thrombin (30 nM) and exosite blocking aptamers (2  
 435  $\mu$ M); then, PAR2 cleavage efficiency was measured. **(D)** 293T cells overexpressed  
 436 AP-PAR2 with or without TM. Where indicated, cells were incubated for 20 minutes  
 437 with thrombin (30 nM) alone or a 1:1 mixture of thrombin and sTM (20 minutes of  
 438 pre-incubation at 37°C for complex formation). Data are presented as mean  $\pm$  SEM;  
 439 three independent experiments were each performed in triplicate; ns  $p > 0.05$ , \*  $p <$   
 440  $0.05$ , \*\*  $p < 0.01$ , \*\*\*  $p < 0.001$ , using student's  $t$  test.  
 441



442 **Role of PAR2 N-terminal arginine 36 in cleavage by thrombin**

443 Previous evidence suggested that PARs harbor a unique cleavage site that  
444 promotes initiation of biological effects [1]. Recently, however, studies have revealed  
445 that PARs behave as “multi-switches” with several cleavage sites, resulting in  
446 cleavage-site-specific biological effects [23, 34, 35, 58] and referred to as biased  
447 signaling. Thus, we investigated whether TM-bound thrombin cleaved PAR2 at  
448 specific sites. Similar to our studies in PAR1 and PAR3 [34], we synthesized mutants  
449 of PAR2 with alanine (A) substitutions for the positively charged amino acids arginine  
450 (R) and lysine (K) in the extracellular N-terminal domain (Supplementary Table S3).  
451 A mutant of PAR2 that was devoid of all R and K on the entire N-terminal domain  
452 (“PAR2 all-to-A” mutant; Supplementary Table S3) resisted cleavage by thrombin  
453 (Figure 4A). Removal of canonical R36 (“PAR2 R36A” mutant; Supplementary Table  
454 S3) yielded an almost thrombin-resistant mutant (Figure 4B); however, additional  
455 sites at which cleavage occurs inefficiently might be present. Thus, our data suggest  
456 that R36 is the preferred cleavage site of TM-bound thrombin; however, the  
457 existence of additional cleavage site(s) cannot be ruled out.

458

459

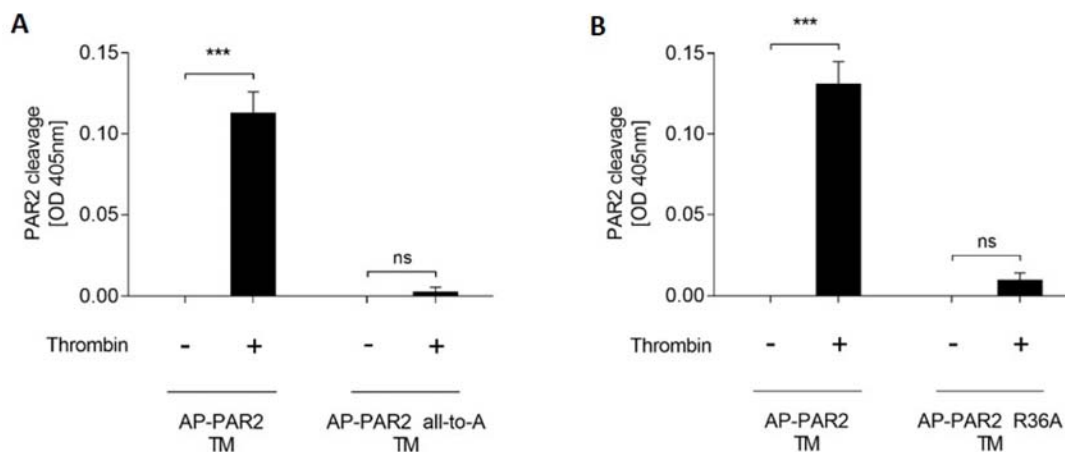

460

461 **Figure 4: TM-bound thrombin preferentially cleaves PAR2 at arginine 36.** (A)  
462 and (B) 293T cells overexpressing TM and wild-type or mutants of AP-PAR2 reporter  
463 constructs. The mutant “AP-PAR2 all-to-A” contained no positively charged amino  
464 acids in the N-terminal PAR2 domain and in the “AP-PAR2 R36A” mutant, arginine  
465 36, was replaced by alanine (details provided in Supplementary Table S3). Cells  
466 were incubated with thrombin (30 nM) for 20 minutes before PAR2 cleavage was  
467 measured. Data are presented as mean  $\pm$  SEM; three independent experiments

468 were each performed in triplicate; (A-B) ns  $p > 0.05$ , \*  $p < 0.05$ , \*\*  $p < 0.01$ , \*\*\*  $p <$   
469 0.001, using student's *t* test.

470

### 471 **Role of the NF- $\kappa$ B pathway downstream of thrombin-cleaved PAR2**

472 Previously, pro-inflammatory signaling was reported to occur because of PAR2  
473 activation by other proteases that cleaved PAR2 at R36 [11-13]. Thus, we  
474 investigated whether TM-bound thrombin cleaved PAR2 and induced pro-  
475 inflammatory signaling via NF- $\kappa$ B activation. In our commercial NF- $\kappa$ B reporter  
476 system, thrombin failed to induce NF- $\kappa$ B activation when PAR2 and TM were absent  
477 or expressed alone (Supplementary Fig. S6a). NF- $\kappa$ B DNA binding activity, however,  
478 increased in a manner dependent on thrombin concentration due to the availability of  
479 PAR2 and TM (Figure 5A). PAR2 agonist peptide SLIGRL induced NF- $\kappa$ B DNA  
480 binding activity in PAR2 and TM overexpressing cells similarly to thrombin; however,  
481 >1000 times higher concentrations of agonist peptide was required to obtain  
482 comparable induction (Figure 5A). Similar to thrombin, the PAR1 agonist peptide  
483 TFLLRNPNDK induced NF- $\kappa$ B activation only if PAR1 was overexpressed. Similarly,  
484 the PAR4 agonist peptide AYPGKF induced NF- $\kappa$ B activation only in cells  
485 overexpressing PAR4. As expected, the PAR4 activation by thrombin was less  
486 efficient compared to PAR1 activation. In the absence of overexpressed PAR1 or  
487 PAR4, agonist peptides showed no such effect, similar to TFLLRNPNDK and  
488 AYPGKF failing to activate endogenous PAR1 or PAR4 in these cells and consistent  
489 with TFLLRNPNDK and AYPGKF failing to activate overexpressed PAR2 in this  
490 system. However, similar to the PAR2 agonist peptide SLIGRL, thrombin-induced  
491 NF- $\kappa$ B activation via PAR2 only in the presence of TM (Supplementary Fig. S6b).

492 Moreover, consistent with our conclusions from the PAR2 cleavage reporter  
493 assay, EGF-like domain 5 of TM was required for thrombin- and PAR2-mediated  
494 induction of NF- $\kappa$ B activation (Figure 5B).

495 We then tested whether thrombin's preferred cleavage site R36 was important  
496 for NF- $\kappa$ B induction. In R36's absence, our assays showed diminished cleavage of  
497 PAR2 and no induction of NF- $\kappa$ B activation (Figure 5C).

498 We then addressed the signal pathways downstream of PAR2 but upstream of  
499 NF- $\kappa$ B activation. Phosphatidylinositol 3-kinase (PI3K) pathway is an important  
500 regulator of NF- $\kappa$ B activation and potentially links PAR2 cleavage and activation to  
501 the NF- $\kappa$ B pathway. To test whether the induction of NF- $\kappa$ B activation after PAR2

502 cleavage occurred via PI3K, we used the PI3K inhibitor LY294002. Consistent with  
503 PI3K linking PAR2 and NF- $\kappa$ B, LY294002 interfered with NF- $\kappa$ B activation by  
504 thrombin and activation by PAR2-specific peptide SLIGRL (Figure 5D).  
505 Note that 293T cells secreted IL-8 with the overexpression of PAR2 and SLIGRL  
506 agonist induction. However, as shown previously [34] and in Supplementary Fig. S6b,  
507 cells remained quiescent upon incubation with the PAR1 agonist peptide, which  
508 confirms our previous conclusion that, without transfection, these cells would not  
509 respond to PAR agonists. Note that thrombin-stimulated 293T cells overexpressing  
510 PAR2 alone remained quiescent. However, in cells expressing TM and PAR2,  
511 thrombin (30 nM) and SLIGRL (50  $\mu$ M) were comparably efficient for inducing the  
512 release of IL-8 (Figure 5E). Thus, our data suggest that PAR2 cleaved at R36 by  
513 TM-bound thrombin induced NF- $\kappa$ B DNA binding activity via PI3K and ultimately  
514 released IL-8 release (Figure 5F).  
515

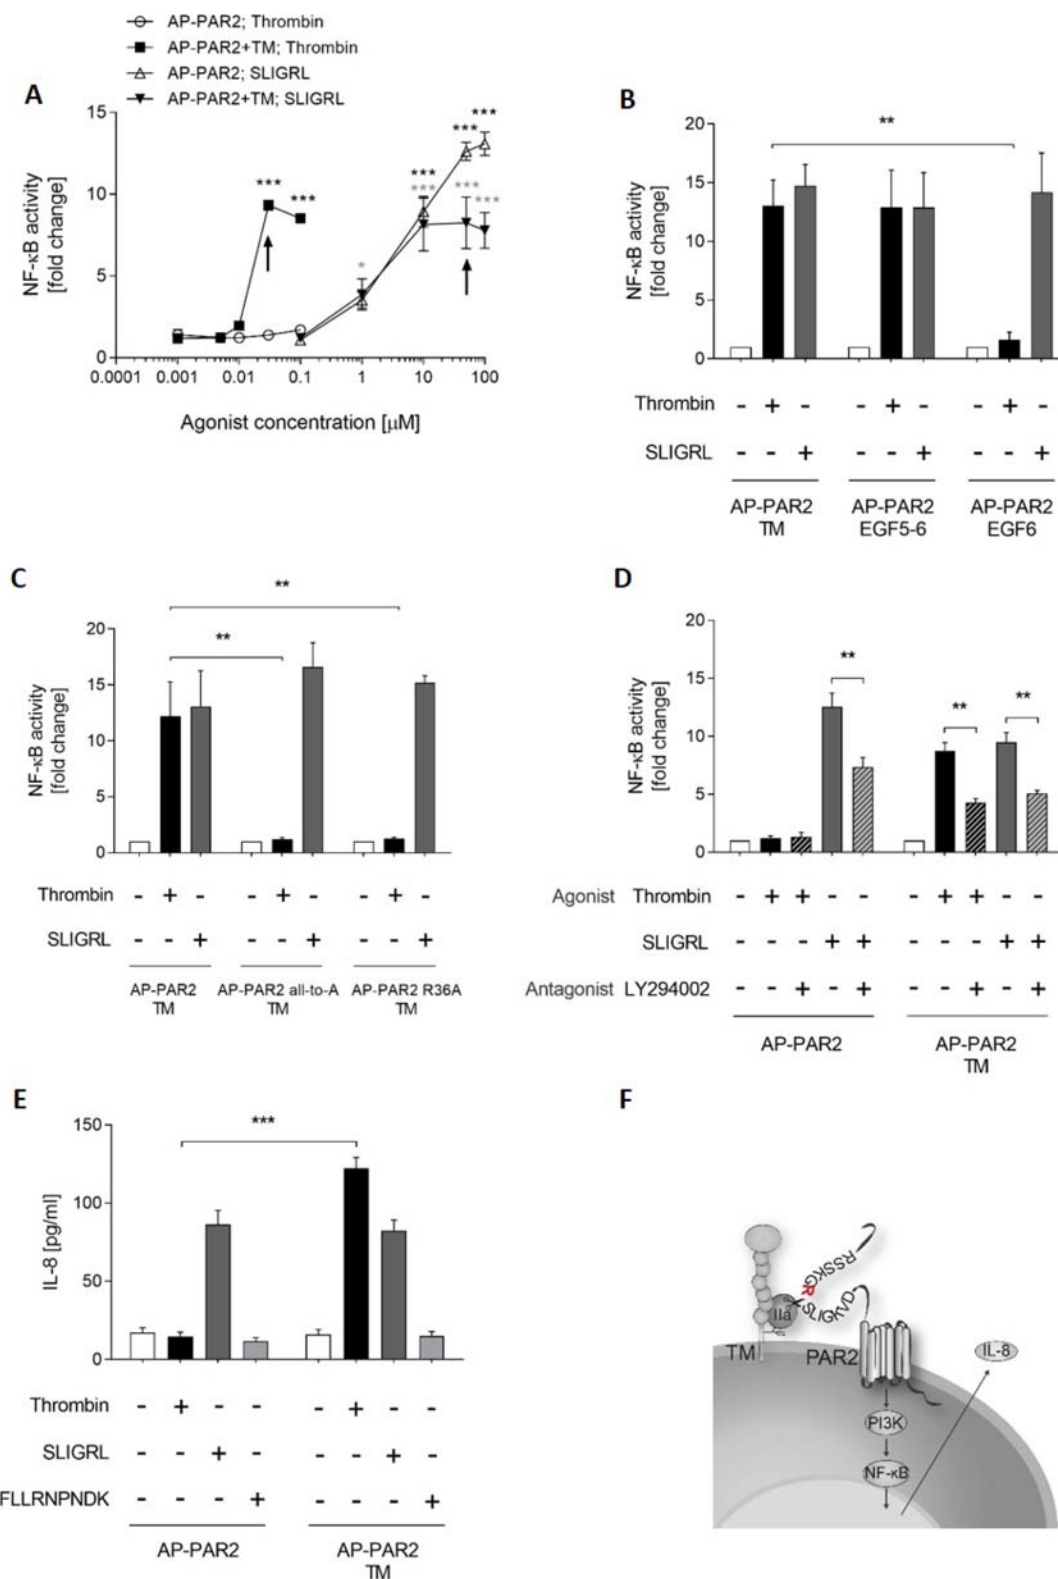

516

517 **Figure 5: NF- $\kappa$ B DNA binding activity and IL-8 release is induced by TM-bound**  
 518 **thrombin in a PAR2-dependent manner. (A) 293T cells carrying an NF- $\kappa$ B reporter**  
 519 **overexpressed either AP-PAR2 alone or AP-PAR2 together with TM, were incubated**

520 with an agonist as indicated and quantified for NF- $\kappa$ B luciferase activity by measuring  
521 luminescence. Arrows indicate thrombin (30 nM) and SLIGRL (50  $\mu$ M),  
522 concentrations used in further NF- $\kappa$ B reporter assays. **(B)** Cells overexpressing NF-  
523  $\kappa$ B reporter, AP-PAR2 together with wild-type TM, a mutant of TM lacking all domains  
524 at the N-terminal side of EGF-like domain 5 ("TM EGF 5–6"), or a mutant lacking all  
525 domains at the N-terminal side of EGF-like domain 6 ("TM EGF 6"). Induction of NF-  
526  $\kappa$ B luciferase activity in response to the buffer, thrombin (30 nM), and SLIGRL (50  
527  $\mu$ M) was also measured. **(C)** Cells overexpressing NF- $\kappa$ B reporter, TM, and either  
528 AP-PAR2 wild-type or AP-PAR2 mutants that lacked all positively charged N-terminal  
529 amino acids ("AP-PAR2 all-to-A") or only arginine 36 ("AP-PAR2 R36A"). Cells were  
530 incubated with buffer, thrombin (30 nM), and SLIGRL (50  $\mu$ M), after which induction  
531 via luciferase was measured. **(D)** Cells overexpressing NF- $\kappa$ B reporter, TM, and AP-  
532 PAR2 were pre-incubated with vehicle (DMSO) or the PI3K inhibitor LY294002  
533 (Sigma) for 2 h, followed by incubation with buffer, thrombin (30 nM), or SLIGRL (50  
534  $\mu$ M) for 6 h before NF- $\kappa$ B luciferase induction was measured. **(E)** 293T cells  
535 expressing AP-PAR2 or AP-PAR2 and TM were incubated with an agonist for 24 h,  
536 followed by quantification of the release of IL-8 into the supernatant. **(F)** Scheme of  
537 proposed PAR2 activation pathway: thrombin (IIa) binds to TM, cleaves PAR2, and  
538 activates the NF- $\kappa$ B pathway via PI3K activation. NF- $\kappa$ B activation induces IL-8  
539 synthesis and release. Data are presented as fold induction of buffer RLU, presented  
540 as mean  $\pm$  SEM; three independent experiments were each performed in triplicate; \*  
541  $p < 0.05$ , \*\*  $p < 0.01$ , \*\*\*  $p < 0.001$ , using two-way ANOVA (B, C, E), one-way  
542 ANOVA (A, D).

543

## 544 Discussion

545 Our data show, for the first time, efficient TM-dependent direct cleavage and  
546 activation of PAR2 by thrombin. This breaks the dogma of PAR2 as the only PAR  
547 that resists activation by an important clotting protease thrombin. In a manner  
548 dependent on TM co-receptor availability, efficient PAR2 cleavage occurred even at  
549 lower concentrations of thrombin. Unexpectedly, at low concentrations of proteases,  
550 efficiency levels of PAR2 reporter cleavage between thrombin and trypsin were  
551 comparable. PAR2 cleavage by thrombin was - in TM's presence of TM -  
552 comparable to cleavage of PAR1, although kinetics differed. While PAR1 was rapidly  
553 cleaved off with minimal sustained cleavage, PAR2 cleavage increased over time.  
554 Thus, we suggest that PAR1 is responsible for rapid thrombin responses while PAR2  
555 sustains the thrombin signaling following PAR1 desensitization. In fact, PAR2  
556 cleavage by thrombin was most efficient at the canonical cleavage site arginine 36.  
557 Note that this study establishes a direct link of cleavage of PAR2 by thrombin to pro-

558 inflammatory signaling such as activation of NF- $\kappa$ B pathway and release of IL-8 in  
559 natively PAR2- and TM-expressing A549 lung epithelial cells. To date, PAR2 has  
560 been assumed to be distinct in the family of PARs in terms of resisting cleavage and  
561 activation by thrombin [1, 5, 26]. However, biological effects of thrombin have now  
562 been linked to PAR2, although the exact mechanism of activation needs to be  
563 clarified. Transactivation of PAR2 by thrombin-cleaved PAR1 is one such standard  
564 model [24, 59], although it is inconsistent with observations demonstrating that  
565 thrombin maintained signaling via PAR2 under conditions where PAR1's tethered  
566 ligand was blocked [9].

567 As an alternative model, two studies have confirmed extremely high  
568 concentrations of free thrombin directly cleaving PAR2 [27, 60]. During a thrombin  
569 burst, the required concentration of thrombin of 100–500 nM is potentially achievable  
570 [61]. However, in-depth studies in mice that lack the thrombin platelet surface  
571 recruiting receptor PAR3 (a nonfunctional receptor in mice) bleed, not in line with the  
572 physiologic occurrence of thrombin concentrations at some hundred nanomolar [62].  
573 Studies involving blocking antibodies [63] support an upper limit of physiologically  
574 relevant thrombin concentrations of <30 nM, thus ruling out the physiological  
575 relevance of PAR2 activation at high concentrations of free thrombin.

576 Similar to our co-receptor-dependent activation of PARs, as shown in the case  
577 of PAR1 by aPC [31] and clotting factor Xa [32], PAR2 by clotting factor FVIIa [22],  
578 or platelet-expressed PAR4 by thrombin [62], we postulated that, for efficient PAR2  
579 activation by thrombin, a co-receptor was required. Indeed, we discovered a novel  
580 co-receptor function of TM, supporting the cleavage and activation of PAR2 by  
581 thrombin. Indeed, TM's presence increased thrombin's efficiency for cleaving PAR2.  
582 Other potential PAR2 cleaving proteases induced or activated by thrombin or the  
583 thrombin-TM complex were ruled out. Highlighting the plausibility of the presence of  
584 TM playing a physiological role, 5 nM thrombin and 5 nM trypsin cleaved PAR2 with  
585 comparable efficiency. Because TM is not the only cell surface receptor for thrombin  
586 [64], other surface recruiting receptors might contribute to further PAR2 activation by  
587 thrombin and explain the PAR2-dependent effects of thrombin in cells that did not  
588 express TM. We identified that the EGF-like domain 5 of TM and exosite I in  
589 thrombin were important for TM-promoted PAR2 cleavage and NF- $\kappa$ B pathway  
590 activation by thrombin. Furthermore, this conclusion was supported by removing the  
591 EGF-like domains on TM and by blocking thrombin exosite I site using a small

592 specific aptamer. Our observations reinforce previous research on TM [55], showing  
593 that in the context of the protein C pathway the described interaction is required for  
594 cell surface recruitment of thrombin. Similarly, interactions between exosite II and CS  
595 help in thrombin recruitment [57]. Furthermore, we found that exosite II blocking  
596 aptamers or exosite II binding heparin interfere with PAR2 cleavage by thrombin.  
597 These results are in accordance with a recently published study that links the TM  
598 glycosaminoglycan domain to immune responses [65].

599 Thus, our data confirms that thrombin activates NF- $\kappa$ B and induces IL-8 release  
600 for overexpressing 293T cells and triggers IL-8 release in A549 cells in a TM- and  
601 PAR2-dependent manner. The specific PAR2 agonist SLIGRL induced IL-8 release,  
602 supporting PAR2 stimulation to be sufficient for IL-8 release. Complementary,  
603 interfering with PAR2 either via inhibition (NDGA) or knock down (siRNA)  
604 significantly reduced responsiveness to thrombin and SLIGRL of natively PAR2  
605 expressing A549 cells. Although thrombin-induced IL-8 release was significantly  
606 reduced in PAR2 silenced or inhibited cells, we failed to render our system fully  
607 thrombin irresponsive. Possible explanations include incomplete PAR2 knock down,  
608 or another (yet to be identified) thrombin receptor induced IL-8 release.

609 With such a well-characterized system, we provided evidence that co-receptor-  
610 bound thrombin directly activates pro-inflammatory pathways via PAR2. Our  
611 evidence confirms that A549 cells did not release IL-8 on stimulation with PAR1  
612 agonist peptide. This result is consistent with that of a recent study [53]. Our results  
613 support that prolonged thrombin signaling via PAR2 / TM could explain pro-  
614 inflammatory signaling in A549 alveolar cells. In view of thrombin inhibition  
615 ameliorating chronic inflammation of the lung as reviewed in [66] one is tempted to  
616 speculate, that thrombin / TM / PAR2 might serve as underlying mechanism. Thus,  
617 stimulation of PAR2 by extravascular thrombin might contribute to inflammatory  
618 diseases of the lung.

619 Our conclusion that thrombin activates PAR2 via the co-receptor TM is heavily  
620 reliant on overexpression systems; thus, the physiological relevance of this has yet  
621 to be established completely. The confirmation of our concept in a single cell line, i.e.,  
622 A549 natively expressing PAR2 and TM, cannot eliminate this important limitation.  
623 However, to summarize, we provide the first evidence that TM-bound thrombin  
624 cleaves and activates PAR2 efficiently at low to moderate nanomolar concentrations  
625 and that this pathway of NF- $\kappa$ B activation results in the release of IL-8 in PAR2- and

626 TM-overexpressing and natively expressing cells. Further studies will be required to  
627 link this novel signaling pathway to important pathophysiological processes,  
628 particularly for chronic inflammatory diseases such as asthma, arthritis, and cancer.  
629 Note that such studies may reveal novel therapeutic strategies for diseases that are  
630 linked to PAR2.

631

632

### 633 **Acknowledgments**

634 We would like to express our sincere gratitude for the support given to RAS by the  
635 Vontobel Stiftung, the Swiss National Science Foundation grant #PZ00P3\_136639,  
636 the Hartmann Müller-Stiftung, the University Hospital Zurich, and the University of  
637 Zurich.

638

### 639 **Authors' Contributions**

640 Study designed by DMH and RAS. Experiments conducted by DMH, AGF, and JM.  
641 Data analysis and interpretation by DMH and RAS. Manuscript preparation by DMH  
642 and RAS. All authors read and approved the final manuscript.

643

644

### 645 **Disclosure of Conflict of Interest**

646 The authors state that they have no conflicts of interest.

647

648

### 649 **References**

- 650 [1] S.R. Coughlin, How the protease thrombin talks to cells, *Proc Natl Acad Sci U S A*  
651 96(20) (1999) 11023-7.  
652 [2] S.R. Coughlin, Thrombin signalling and protease-activated receptors, *Nature* 407(6801)  
653 (2000) 258-64.  
654 [3] H. Ishihara, A.J. Connolly, D. Zeng, M.L. Kahn, Y.W. Zheng, C. Timmons, T. Tram, S.R.  
655 Coughlin, Protease-activated receptor 3 is a second thrombin receptor in humans, *Nature*  
656 386(6624) (1997) 502-6.  
657 [4] M.L. Kahn, Y.W. Zheng, W. Huang, V. Bigornia, D. Zeng, S. Moff, R.V. Farese, Jr., C.  
658 Tam, S.R. Coughlin, A dual thrombin receptor system for platelet activation, *Nature*  
659 394(6694) (1998) 690-4.  
660 [5] S. Nystedt, K. Emilsson, C. Wahlestedt, J. Sundelin, Molecular cloning of a potential  
661 proteinase activated receptor, *Proc Natl Acad Sci U S A* 91(20) (1994) 9208-12.



- 662 [6] T.K. Vu, D.T. Hung, V.I. Wheaton, S.R. Coughlin, Molecular cloning of a functional  
663 thrombin receptor reveals a novel proteolytic mechanism of receptor activation, *Cell* 64(6)  
664 (1991) 1057-68.
- 665 [7] W.F. Xu, H. Andersen, T.E. Whitmore, S.R. Presnell, D.P. Yee, A. Ching, T. Gilbert,  
666 E.W. Davie, D.C. Foster, Cloning and characterization of human protease-activated receptor  
667 4, *Proc Natl Acad Sci U S A* 95(12) (1998) 6642-6.
- 668 [8] E.B. Kelso, J.C. Lockhart, T. Hembrough, L. Dunning, R. Plevin, M.D. Hollenberg, C.P.  
669 Sommerhoff, J.S. McLean, W.R. Ferrell, Therapeutic Promise of Par2 Antagonism in Joint  
670 Inflammation, *J Pharmacol Exp Ther* (2005).
- 671 [9] X. Shi, B. Gangadharan, L.F. Brass, W. Ruf, B.M. Mueller, Protease-activated receptors  
672 (PAR1 and PAR2) contribute to tumor cell motility and metastasis, *Mol Cancer Res* 2(7)  
673 (2004) 395-402.
- 674 [10] N. Vergnolle, N.W. Bunnett, K.A. Sharkey, V. Brussee, S.J. Compton, E.F. Grady, G.  
675 Cirino, N. Gerard, A.I. Basbaum, P. Andrade-Gordon, M.D. Hollenberg, J.L. Wallace,  
676 Proteinase-activated receptor-2 and hyperalgesia: A novel pain pathway, *Nat Med* 7(7)  
677 (2001) 821-6.
- 678 [11] F. Schmidlin, S. Amadesi, K. Dabbagh, D.E. Lewis, P. Knott, N.W. Bunnett, P.R. Gater,  
679 P. Geppetti, C. Bertrand, M.E. Stevens, Protease-activated receptor 2 mediates eosinophil  
680 infiltration and hyperreactivity in allergic inflammation of the airway, *J Immunol* 169(9)  
681 (2002) 5315-21.
- 682 [12] V. Knight, J. Tchongue, D. Lourensz, P. Tipping, W. Sievert, Protease-activated receptor  
683 2 promotes experimental liver fibrosis in mice and activates human hepatic stellate cells,  
684 *Hepatology* 55(3) (2012) 879-87.
- 685 [13] N.W. Bunnett, Protease-activated receptors: how proteases signal to cells to cause  
686 inflammation and pain, *Semin Thromb Hemost* 32 Suppl 1 (2006) 39-48.
- 687 [14] I. Seitz, S. Hess, H. Schulz, R. Eckl, G. Busch, H.P. Montens, R. Brandl, S. Seidl, A.  
688 Schomig, I. Ott, Membrane-type serine protease-1/matriptase induces interleukin-6 and -8 in  
689 endothelial cells by activation of protease-activated receptor-2: potential implications in  
690 atherosclerosis, *Arterioscler Thromb Vasc Biol* 27(4) (2007) 769-75.
- 691 [15] S. Antoniak, M. Rojas, D. Spring, T.A. Bullard, E.D. Verrier, B.C. Blaxall, N. Mackman,  
692 R. Pawlinski, Protease-activated receptor 2 deficiency reduces cardiac ischemia/reperfusion  
693 injury, *Arterioscler Thromb Vasc Biol* 30(11) (2010) 2136-42.
- 694 [16] S.M. Jones, A. Mann, K. Conrad, K. Saum, D.E. Hall, L.M. McKinney, N. Robbins, J.  
695 Thompson, A.D. Peairs, E. Camerer, K.J. Rayner, M. Tranter, N. Mackman, P. Owens, PAR2  
696 (Protease-Activated Receptor 2) Deficiency Attenuates Atherosclerosis in Mice, *Arterioscler*  
697 *Thromb Vasc Biol* 38(4) (2018).
- 698 [17] H.H. Versteeg, F. Schaffner, M. Kerver, H.H. Petersen, J. Ahamed, B. Felding-  
699 Habermann, Y. Takada, B.M. Mueller, W. Ruf, Inhibition of tissue factor signaling  
700 suppresses tumor growth, *Blood* 111(1) (2008) 190-9.
- 701 [18] M. Jaber, M. Maoz, A. Kancharla, D. Agranovich, T. Peretz, S. Grisaru-Granovsky, B.  
702 Uziely, R. Bar-Shavit, Protease-activated-receptor-2 affects protease-activated-receptor-1-  
703 driven breast cancer, *Cell Mol Life Sci* (2013).
- 704 [19] F. Schaffner, H.H. Versteeg, A. Schillert, N. Yokota, L.C. Petersen, B.M. Mueller, W.  
705 Ruf, Cooperation of tissue factor cytoplasmic domain and PAR2 signaling in breast cancer  
706 development, *Blood* (2010).
- 707 [20] H. Lin, J. Trejo, Transactivation of the PAR1-PAR2 heterodimer by thrombin elicits  
708 beta-arrestin-mediated endosomal signaling, *J Biol Chem* 288(16) (2013) 11203-15.
- 709 [21] S. Nystedt, K. Emilsson, A.K. Larsson, B. Strombeck, J. Sundelin, Molecular cloning  
710 and functional expression of the gene encoding the human proteinase-activated receptor 2,  
711 *Eur J Biochem* 232(1) (1995) 84-9.

- 712 [22] E. Camerer, W. Huang, S.R. Coughlin, Tissue factor- and factor X-dependent activation  
713 of protease-activated receptor 2 by factor VIIa, *Proc Natl Acad Sci U S A* 97(10) (2000)  
714 5255-60.
- 715 [23] R. Ramachandran, K. Mihara, H. Chung, B. Renaux, C.S. Lau, D.A. Muruve, K.A.  
716 DeFea, M. Bouvier, M.D. Hollenberg, Neutrophil elastase acts as a biased agonist for  
717 proteinase-activated receptor-2 (PAR2), *J Biol Chem* 286(28) (2011) 24638-48.
- 718 [24] N.C. Kaneider, A.J. Leger, A. Agarwal, N. Nguyen, G. Perides, C. Derian, L. Covic, A.  
719 Kuliopulos, 'Role reversal' for the receptor PAR1 in sepsis-induced vascular damage, *Nat*  
720 *Immunol* 8(12) (2007) 1303-12.
- 721 [25] M.D. Hollenberg, K. Mihara, D. Polley, J.Y. Suen, A. Han, D.P. Fairlie, R.  
722 Ramachandran, Biased signalling and proteinase-activated receptors (PARs): targeting  
723 inflammatory disease, *Br J Pharmacol* 171(5) (2014) 1180-94.
- 724 [26] P.J. O'Brien, M. Molino, M. Kahn, L.F. Brass, Protease activated receptors: theme and  
725 variations, *Oncogene* 20(13) (2001) 1570-81.
- 726 [27] K. Mihara, R. Ramachandran, M. Saifeddine, K.K. Hansen, B. Renaux, D. Polley, S.  
727 Gibson, C. Vanderboor, M.D. Hollenberg, Thrombin-mediated direct activation of  
728 proteinase-activated receptor-2 (PAR2): another target for thrombin signaling, *Mol*  
729 *Pharmacol* (2016).
- 730 [28] H. Suzuki, E.D. Motley, K. Eguchi, A. Hinoki, H. Shirai, V. Watts, L.N. Stemmler, T.A.  
731 Fields, S. Eguchi, Distinct roles of protease-activated receptors in signal transduction  
732 regulation of endothelial nitric oxide synthase, *Hypertension* 53(2) (2009) 182-8.
- 733 [29] E.A. Lidington, R. Steinberg, A.R. Kinderlerer, R.C. Landis, M. Ohba, A. Samarel, D.O.  
734 Haskard, J.C. Mason, A role for proteinase-activated receptor 2 and PKC-epsilon in  
735 thrombin-mediated induction of decay-accelerating factor on human endothelial cells, *Am J*  
736 *Physiol Cell Physiol* 289(6) (2005) C1437-47.
- 737 [30] R. Pawlinski, M. Holinstat, We can do it together: PAR1/PAR2 heterodimer signaling in  
738 VSMCs, *Arterioscler Thromb Vasc Biol* 31(12) (2011) 2775-6.
- 739 [31] M. Riewald, R.J. Petrovan, A. Donner, B.M. Mueller, W. Ruf, Activation of endothelial  
740 cell protease activated receptor 1 by the protein C pathway, *Science* 296(5574) (2002) 1880-2.
- 741 [32] R.A. Schuepbach, M. Riewald, Coagulation factor Xa cleaves protease-activated  
742 receptor-1 and mediates signaling dependent on binding to the endothelial protein C receptor,  
743 *J Thromb Haemost* 8(2) (2010) 379-88.
- 744 [33] H. Guo, D. Liu, H. Gelbard, T. Cheng, R. Insalaco, J.A. Fernandez, J.H. Griffin, B.V.  
745 Zlokovic, Activated protein C prevents neuronal apoptosis via protease activated receptors 1  
746 and 3, *Neuron* 41(4) (2004) 563-72.
- 747 [34] R.A. Schuepbach, J. Madon, M. Ender, P. Galli, M. Riewald, Protease Activated  
748 Receptor-1 Cleaved at R46 Mediates Cytoprotective Effects, *J Thromb Haemost* (2012).
- 749 [35] L. Burnier, L.O. Mosnier, Novel mechanisms for activated protein C cytoprotective  
750 activities involving noncanonical activation of protease-activated receptor 3, *Blood* 122(5)  
751 (2013) 807-16.
- 752 [36] M. Nakanishi-Matsui, Y.W. Zheng, D.J. Sulciner, E.J. Weiss, M.J. Ludeman, S.R.  
753 Coughlin, PAR3 is a cofactor for PAR4 activation by thrombin, *Nature* 404(6778) (2000)  
754 609-13.
- 755 [37] K. Suzuki, H. Kusumoto, Y. Deyashiki, J. Nishioka, I. Maruyama, M. Zushi, S.  
756 Kawahara, G. Honda, S. Yamamoto, S. Horiguchi, Structure and Expression of Human  
757 Thrombomodulin, a Thrombin Receptor on Endothelium Acting as a Cofactor for Protein-C  
758 Activation, *Embo J* 6(7) (1987) 1891-1897.
- 759 [38] D.J. Stearns, S. Kurosawa, C.T. Esmon, Microthrombomodulin. Residues 310-486 from  
760 the epidermal growth factor precursor homology domain of thrombomodulin will accelerate  
761 protein C activation, *J Biol Chem* 264(6) (1989) 3352-6.

- 762 [39] C.T. Esmon, W.G. Owen, Identification of an endothelial cell cofactor for thrombin-  
763 catalyzed activation of protein C, *Proc Natl Acad Sci U S A* 78(4) (1981) 2249-52.
- 764 [40] T.J. Raife, D.J. Lager, K.C. Madison, W.W. Piette, E.J. Howard, M.T. Sturm, Y. Chen,  
765 S.R. Lentz, Thrombomodulin Expression by Human Keratinocytes Induction of Cofactor  
766 Activity during Epidermal Differentiation, *J Clin Invest* 93(4) (1994) 1846-1851.
- 767 [41] A. Pindon, M. Berry, D. Hantai, Thrombomodulin as a new marker of lesion-induced  
768 astrogliosis: Involvement of thrombin through the G-protein-coupled protease activated  
769 receptor-1, *J Neurosci* 20(7) (2000) 2543-2550.
- 770 [42] S.S. Mccachren, J. Diggs, J.B. Weinberg, W.A. Dittman, Thrombomodulin Expression  
771 by Human Blood Monocytes and by Human Synovial Tissue Lining Macrophages, *Blood*  
772 78(12) (1991) 3128-3132.
- 773 [43] L. Wang, J.A. Bastarache, N. Wickersham, X.H. Fang, M.A. Matthay, L.B. Ware, Novel  
774 role of the human alveolar epithelium in regulating intra-alveolar coagulation, *Am J Resp*  
775 *Cell Mol* 36(4) (2007) 497-503.
- 776 [44] C.T. Esmon, Thrombomodulin as a model of molecular mechanisms that modulate  
777 protease specificity and function at the vessel surface, *Faseb J* 9(10) (1995) 946-55.
- 778 [45] D.A. Lane, H. Philippou, J.A. Huntington, Directing thrombin, *Blood* 106(8) (2005)  
779 2605-12.
- 780 [46] T. Okamoto, H. Tanigami, K. Suzuki, M. Shimaoka, Thrombomodulin: a bifunctional  
781 modulator of inflammation and coagulation in sepsis, *Crit Care Res Pract* 2012 (2012)  
782 614545.
- 783 [47] H. Loghmani, E.M. Conway, Exploring traditional and nontraditional roles for  
784 thrombomodulin, *Blood* 132(2) (2018) 148-158.
- 785 [48] R.F. Macaya, P. Schultze, F.W. Smith, J.A. Roe, J. Feigon, Thrombin-binding DNA  
786 aptamer forms a unimolecular quadruplex structure in solution, *Proc Natl Acad Sci U S A*  
787 90(8) (1993) 3745-9.
- 788 [49] K. Segers, B. Dahlback, P.E. Bock, G. Tans, J. Rosing, G.A. Nicolaes, The role of  
789 thrombin exosites I and II in the activation of human coagulation factor V, *J Biol Chem*  
790 282(47) (2007) 33915-24.
- 791 [50] R.A. Schuepbach, C. Feistritz, L.F. Brass, M. Riewald, Activated protein C-cleaved  
792 protease activated receptor-1 is retained on the endothelial cell surface even in the presence  
793 of thrombin, *Blood* 111(5) (2008) 2667-73.
- 794 [51] N. Asokanathan, P.T. Graham, J. Fink, D.A. Knight, A.J. Bakker, A.S. McWilliam, P.J.  
795 Thompson, G.A. Stewart, Activation of protease-activated receptor (PAR)-1, PAR-2, and  
796 PAR-4 stimulates IL-6, IL-8, and prostaglandin E2 release from human respiratory epithelial  
797 cells, *J Immunol* 168(7) (2002) 3577-85.
- 798 [52] H. Wang, Y. Zheng, S. He, Induction of release and up-regulated gene expression of  
799 interleukin (IL)-8 in A549 cells by serine proteinases, *BMC Cell Biol* 7 (2006) 22.
- 800 [53] E. Ostrowska, E. Sokolova, G. Reiser, PAR-2 activation and LPS synergistically  
801 enhance inflammatory signaling in airway epithelial cells by raising PAR expression level  
802 and interleukin-8 release, *Am J Physiol Lung Cell Mol Physiol* 293(5) (2007) L1208-18.
- 803 [54] M. Ender, F. Andreoni, A.S. Zinkernagel, R.A. Schuepbach, Streptococcal SpeB  
804 Cleaved PAR-1 Suppresses ERK Phosphorylation and Blunts Thrombin-Induced Platelet  
805 Aggregation, *PLoS One* 8(11) (2013) e81298.
- 806 [55] K. Suzuki, T. Hayashi, J. Nishioka, Y. Kosaka, M. Zushi, G. Honda, S. Yamamoto, A  
807 domain composed of epidermal growth factor-like structures of human thrombomodulin is  
808 essential for thrombin binding and for protein C activation, *J Biol Chem* 264(9) (1989) 4872-  
809 6.
- 810 [56] M.C. Bourin, U. Lindahl, Glycosaminoglycans and the regulation of blood coagulation,  
811 *Biochem J* 289 ( Pt 2) (1993) 313-30.

- 812 [57] J.W. Weisel, C. Nagaswami, T.A. Young, D.R. Light, The shape of thrombomodulin and  
813 interactions with thrombin as determined by electron microscopy, *J Biol Chem* 271(49)  
814 (1996) 31485-90.
- 815 [58] V. Trivedi, A. Boire, B. Tchernychev, N.C. Kaneider, A.J. Leger, K. O'Callaghan, L.  
816 Covic, A. Kuliopulos, Platelet matrix metalloprotease-1 mediates thrombogenesis by  
817 activating PAR1 at a cryptic ligand site, *Cell* 137(2) (2009) 332-43.
- 818 [59] L.M. Sevigny, K.M. Austin, P. Zhang, S. Kasuda, G. Koukos, S. Sharifi, L. Covic, A.  
819 Kuliopulos, Protease-activated receptor-2 modulates protease-activated receptor-1-driven  
820 neointimal hyperplasia, *Arterioscler Thromb Vasc Biol* 31(12) (2011) e100-6.
- 821 [60] D. Loew, C. Perrault, M. Morales, S. Moog, C. Ravanat, S. Schuhler, R. Arcone, C.  
822 Pietropaolo, J.P. Cazenave, A. van Dorsselaer, F. Lanza, Proteolysis of the exodomain of  
823 recombinant protease-activated receptors: prediction of receptor activation or inactivation by  
824 MALDI mass spectrometry, *Biochemistry* 39(35) (2000) 10812-22.
- 825 [61] S. Butenas, C. van't Veer, K.G. Mann, "Normal" thrombin generation, *Blood* 94(7)  
826 (1999) 2169-78.
- 827 [62] G.R. Sambrano, E.J. Weiss, Y.W. Zheng, W. Huang, S.R. Coughlin, Role of thrombin  
828 signalling in platelets in haemostasis and thrombosis, *Nature* 413(6851) (2001) 74-8.
- 829 [63] M.L. Kahn, M. Nakanishi-Matsui, M.J. Shapiro, H. Ishihara, S.R. Coughlin, Protease-  
830 activated receptors 1 and 4 mediate activation of human platelets by thrombin, *J Clin Invest*  
831 103(6) (1999) 879-87.
- 832 [64] D. Dormann, K.J. Clemetson, B.E. Kehrel, The GPIb thrombin-binding site is essential  
833 for thrombin-induced platelet procoagulant activity, *Blood* 96(7) (2000) 2469-78.
- 834 [65] V.C. Pai, I.C. Lo, Y.W. Huang, I.C. Tsai, H.P. Cheng, G.Y. Shi, H.L. Wu, M.J. Jiang,  
835 The chondroitin sulfate moiety mediates thrombomodulin-enhanced adhesion and migration  
836 of vascular smooth muscle cells, *J Biomed Sci* 25(1) (2018) 14.
- 837 [66] J.K. Shute, E. Puxeddu, L. Calzetta, Therapeutic use of heparin and derivatives beyond  
838 anticoagulation in patients with bronchial asthma or COPD, *Curr Opin Pharmacol* 40 (2018)  
839 39-45.
- 840
- 841
